# Supplementary material for: Global variations and time trends in the prevalence of primary open angle glaucoma (POAG): a systematic review and meta-analysis
Source: PubMed Central journal article supplement (PMC4717368; doi:10.1136/bjophthalmol-2015-307223), 2015-08-18
Supplement: bjophthalmol-2015-307223-s1.pdf [file bjophthalmol-2015-307223-s1.pdf]

# **Title: Global variations and time trends in the prevalence of Primary Open Angle Glaucoma (POAG); a systematic review and meta-analysis**

Authors: Venediktos V Kapetanakis,<sup>1\*</sup> Michelle P Y Chan,<sup>2\*</sup> Paul J Foster,<sup>2,3</sup> Derek G Cook,<sup>1</sup>

Christopher G Owen,<sup>1</sup> Alicja R Rudnicka<sup>1</sup>

1. Population Health Research Institute, St George's, University of London, Cranmer Terrace, London, SW17 0RE, UK

2. Division of Genetics and Epidemiology, UCL Institute of Ophthalmology, 11-43 Bath Street, London EC1V 9EL, UK

3. NIHR Biomedical Research Centre Moorfields Eye Hospital NHS Foundation Trust, 162 City Road, London EC1V 2PD, UK.

\* Joint first authors

Address for correspondence:- Dr Alicja R Rudnicka, as above, tel: +44 (0)20 87252799, fax: +44 (0)20 87253584, e-mail: arudnick@sgul.ac.uk

## Supplemental Material

### STATISTICAL APPENDIX: BAYSIAN MODELS FOR THE ESTIMATION OF POAG PREVALENCE

#### Prevalence of POAG for both genders combined, adjusted for multiple risk factors

Some surveys report POAG prevalence or number of POAG cases for the whole population sample whilst other studies report results in finer granularity (e.g. by age group, ethnicity, habitation type and sex). All regression models were based on data stratified by ethnicity with the finest possible granularity with respect to age and habitation type. When data were reported separately by age and habitation type but not by both age and habitation type, preference was given to stratification by age.

Let  $I$  be the total number of clusters defined by the combination of published article, survey year and geographical location as explained in the statistical analysis Section. For each  $i \in \{1, \dots, I\}$ , let  $K_i$  be the total number of estimates of POAG prevalence in cluster  $i$ . For each  $i \in \{1, \dots, I\}$  and  $k_i \in \{1, \dots, K_i\}$ , let  $n_{ik_i}$  denote the number of POAG cases within population  $i$  of sample size  $N_{ik_i}$ , and  $p_{ik_i} = \frac{n_{ik_i}}{N_{ik_i}}$  denote the corresponding prevalence estimate. Our main regression model is described

by the following formulas:

$$n_{ik_i} \sim \text{Binomial}(p_{ik_i}, N_{ik_i})$$

$$\text{logit}(p_{ik_i}) = \beta_0 + \beta_A A_{k_i} + \sum_{m=1}^6 \beta_E^{(m)} E_{k_i}^{(m)} + \sum_{m=1}^6 \beta_{AE}^{(m)} A_{k_i} E_{k_i}^{(m)} + \sum_{m=1}^3 \beta_D^{(m)} D_{k_i}^{(m)} + U_i$$

$$U_i \sim N(0, \sigma^2)$$

for  $k_i \in \{1, \dots, K_i\}$  and  $i \in \{1, \dots, I\}$ , where  $A$  is age;  $E^{(1)}, E^{(2)}, E^{(3)}, E^{(4)}, E^{(5)}, E^{(6)}$  are indicator variables for East Asian, South Asian, South-East Asian, black, Hispanic or Latino, and mixed or other ethnic populations, respectively;  $D^{(1)}, D^{(2)}, D^{(3)}$  are indicator variables for surveys in which identification of POAG included visual field assessment on all participants and intra ocular pressure was used as a defining criterion of POAG, surveys in which identification of POAG did not include visual field assessment on all participants and intra ocular pressure was used as a defining criterion of POAG, and surveys in which identification of POAG did not include visual field assessment on all participants nor did POAG case definition rely on intra ocular pressure criteria, respectively; and  $U_i$  are random effects taking into account the hierarchical structure of the data according to which estimates of prevalence are nested within clusters. The model allows a different log-linear association between age and prevalence of POAG by ethnicity. Low-information prior distributions were used for the quantity  $\tau = 1/\sigma^2$  and all other regression coefficients.

### **Other regression models**

Additional regression models investigating the independent associations between the prevalence of POAG and i) age by ethnicity, iii) survey year, iv) study design factors based on use of visual fields and intraocular pressure assessment, v) study design factors based on ISGEO classification and vi) sex were carried out following a similar approach.

### **POAG prevalence and 95% credible intervals by ethnicity and age**

Median POAG prevalence estimates and associated 95% credible intervals were obtained from Model 6, standardising to studies that routinely used VFs on all participants to diagnose POAG. For each ethnic group  $m$ , the distribution of POAG prevalence at age  $A$  was obtained by:

$$p(A, m) = 1/(1 + \exp(-\beta_0 - \beta_A A - \beta_{E^{(m)}} E^{(m)} - \beta_{AE^{(m)}} AE^{(m)} - \epsilon))$$

$$\epsilon \sim N\left(0, \frac{\sigma^2}{I}\right)$$

where  $A$  is age and  $E^{(1)}, E^{(2)}, E^{(3)}, E^{(4)}, E^{(5)}, E^{(6)}$  are indicator variables for East Asian, South Asian, South-East Asian, black, Hispanic or Latino, and mixed or other ethnic populations, respectively.

## **PROGRAMMING CODE**

The OpenBUGS and R programming code for the implementation of all models is available from the authors upon request.

## **SUPPLEMENTAL TABLES**

### **Table legends**

Supplemental Table S1. Articles contributing to the meta-analysis

Supplemental Table S2. Estimated prevalence of POAG by age (yearly), gender and ethnicity

**Supplemental Table S1.** Articles contributing to the meta-analysis

| Ethnicity | Author           | Study name / Location, Country | Publication Year | Participant Numbers | POAG cases | Gender |   |   | Age range | Habitation type | ISGEO | VF/IOP |
|-----------|------------------|--------------------------------|------------------|---------------------|------------|--------|---|---|-----------|-----------------|-------|--------|
|           |                  |                                |                  |                     |            | M      | F | B |           |                 |       |        |
| White     | Hollows [24]     | Ferndale, Wales, UK            | 1966             | 4231                | 20         | •      | • | • | 40-74     | Rural           | 3     | 2      |
|           | Bankes [25]      | Bedford, UK                    | 1968             | 5941                | 45         |        |   | • | 20+       | Urban           | 3     | 2      |
|           | Leibowitz [26]   | Framingham, USA                | 1980             | 2631                | 50         | •      | • | • | 52-85     | Mixed           | 3     | 2      |
|           | Bengtsson [27]   | Dalby, Sweden                  | 1981             | 1511                | 13         |        |   | • | 58-69     | Rural           | 3     | 0      |
|           | Martinez [28]    | Gisborne, New Zealand          | 1982             | 481                 | 20         | •      | • | • | 65+       | Urban           | 3     | 2      |
|           | Gibson [29]      | Melton Mowbray, UK             | 1985             | 484                 | 32         | •      | • | • | 76+       | Urban           | 3     | 2      |
|           | Ringvold [30]    | Middle-Norway                  | 1991             | 1871                | 63         |        |   | • | 65+       | Urban           | 3     | 2      |
|           | Tielsch [12]     | Baltimore, MD, USA             | 1991             | 2913                | 32         |        |   | • | 40+       | Urban           | 3     | 0      |
|           | Klein [31]       | Beaver Dam, WI, USA            | 1992             | 4926                | 104        | •      | • | • | 43+       | Rural           | 3     | 1      |
|           | Coffey [32]      | Roscommon, Ireland             | 1993             | 2186                | 41         | •      | • | • | 50+       | Rural           | 3     | 2      |
|           | Dielemans [33]   | Rotterdam, The Netherlands     | 1994             | 3062                | 34         | •      | • | • | 55+       | Urban           | 3     | 1      |
|           | Leske [34]       | Barbados, West Indies          | 1994             | 133                 | 1          | •      | • | • | 40-86     | Mixed           | 3     | 0      |
|           | Giuffre [35]     | Casteldaccia, Sicily, Italy    | 1995             | 1062                | 13         | •      | • | • | 40-99     | Rural           | 3     | 2      |
|           | Hirvela [23]     | Oulu, Finland                  | 1995             | 500                 | 27         |        |   | • | 70-95     | Rural           | 3     | 3      |
|           | Ekstrom [36]     | Tierp, Sweden                  | 1996             | 760                 | 29         | •      | • | • | 65-74     | Urban           | 3     | 0      |
|           | Mitchell [37]    | Blue Mountains, Australia      | 1996             | 3655                | 87         |        |   | • | 49+       | Urban           | 3     | 0      |
|           | Cedrone [38]     | Ponza, Italy                   | 1997             | 1034                | 26         | •      | • | • | 40+       | Rural           | 3     | 2      |
|           | Bonomi [39]      | Egna-Neumarkt, Italy           | 1998             | 4297                | 84         | •      | • | • | 40+       | Rural           | 3     | 0      |
|           | Reidy [40]       | North London, UK               | 1998             | 1547                | 47         | •      | • | • | 65-100    | Urban           | 3     | 0      |
|           | Kozobolis [41]   | Crete, Greece                  | 2000             | 1107                | 31         | •      | • | • | 40+       | Mixed           | 3     | 2      |
|           | Weih[42]         | Melbourne VIP, Australia       | 2001             | 3264                | 56         | •      | • | • | 40+       | Urban           | 3     | 1      |
|           | Weih[42]         | Melbourne VIP, Australia       | 2001             | 1469                | 29         | •      | • | • | 40+       | Rural           | 3     | 1      |
|           | Anton [43]       | Segovia, Spain                 | 2004             | 510                 | 10         | •      | • | • | 40-79     | Urban           | 3     | 0      |
|           | Nizankowska [44] | Wroclaw, Poland                | 2005             | 4853                | 62         | •      | • | • | 40-79     | Urban           | 3     | 2      |
|           | Friedman [11]    | Salisbury, MD, USA             | 2006             | 929                 | 79         |        |   | • | 73+       | Urban           | 3     | 0      |
|           | Astrom [45]      | Skelleftea, Sweden             | 2007             | 339                 | 1          | •      | • | • | 66        | Urban           | 3     | 3      |

| Ethnicity   | Author             | Study name / Location, Country   | Publication Year     | Participant Numbers | POAG cases | Gender |   |   | Age range | Habitation type | ISGEO | VF/IOP |
|-------------|--------------------|----------------------------------|----------------------|---------------------|------------|--------|---|---|-----------|-----------------|-------|--------|
|             |                    |                                  |                      |                     |            | M      | F | B |           |                 |       |        |
| Black       | Sakata [46]        | Piraquara City, Brazil           | 2007                 | 1170                | 25         | •      | • | • | 40+       | Urban           | 2     | 2      |
|             | Topouzis [47]      | Thessaloniki Eye Study, Greece   | 2007                 | 2554                | 98         |        |   | • | 60+       | Urban           | 3     | 0      |
|             | Arnarsson [48]     | Reykjavik, Iceland               | 2009                 | 1045                | 29         |        |   | • | 50+       | Urban           | 2     | 3      |
|             | Wallace [49]       | Jamaica, West Indies             | 1969                 | 574                 | 6          |        |   | • | 35-74     | Mixed           | 3     | 1      |
|             | Mason [50]         | St. Lucia, West Indies           | 1989                 | 1679                | 147        | •      | • | • | 30+       | Mixed           | 3     | 2      |
|             | Tielsch [12]       | Baltimore, MD, USA               | 1991                 | 2395                | 100        |        |   | • | 40+       | Urban           | 3     | 0      |
|             | Leske [34]         | Barbados, West Indies            | 1994                 | 4498                | 308        | •      | • | • | 40-86     | Mixed           | 3     | 0      |
|             | Wormald [51]       | London, UK                       | 1994                 | 873                 | 32         | •      | • | • | 35+       | Urban           | 3     | 0      |
|             | Buhrmann [52]      | Kongwa, East Africa              | 2000                 | 3247                | 99         |        |   | • | 40+       | Rural           | 3     | 0      |
|             | Ekwerekwu [53]     | Alum-Inyi, Nigeria               | 2002                 | 664                 | 14         |        |   | • | 30+       | Rural           | 3     | 2      |
|             | Rotchford [54]     | Kwazulu-Natal, South Africa      | 2002                 | 1005                | 28         |        |   | • | 40+       | Rural           | 1     | 0      |
|             | Rotchford [55]     | Temba, South Africa              | 2003                 | 839                 | 31         |        |   | • | 40-97     | Urban           | 1     | 0      |
|             | Ntim-Amponsah [56] | Ghana, West Africa               | 2004                 | 1785                | 149        | •      | • | • | 30-100    | Mixed           | 3     | 2      |
|             | Friedman [11]      | Salisbury, MD, USA               | 2006                 | 285                 | 57         |        |   | • | 73+       | Urban           | 3     | 0      |
|             | East Asian         | Ashaye [57]                      | Southwestern Nigeria | 2013                | 811        | 50     | • | • | •         | 40+             | Urban | 2      |
| Budenz [58] |                    | Tema Eye Survey                  | 2013                 | 5603                | 342        | •      | • | • | 40+       | Urban           | 1     | 0      |
| Hu [21]     |                    | Shunyi, Beijing, China           | 1989                 | 3000                | 1          |        |   | • | 40+       | Urban           | 3     | 2      |
| Shiose [59] |                    | Japan                            | 1991                 | 8924                | 224        | •      | • | • | 30+       | Rural           | 3     | 2      |
| Foster [60] |                    | Hovsgol, Mongolia                | 1996                 | 942                 | 5          | •      | • | • | 40-89     | Rural           | 3     | 0      |
| Iwase [61]  |                    | Tajimi, Japan                    | 2004                 | 3021                | 119        | •      | • | • | 40+       | Urban           | 3     | 0      |
| He [62]     |                    | Liwan District, Guangzhou, China | 2006                 | 1405                | 29         | •      | • | • | 50-93     | Urban           | 2     | 2      |
| Ohkubo [63] |                    | Komatsu City, Japan              | 2007                 | 1128                | 58         |        |   | • | 40+       | Urban           | 2     | 3      |
| Wang [64]   |                    | Beijing Eye Study, China         | 2010                 | 4315                | 111        | •      | • | • | 40+       | Mixed           | 1     | 0      |
| Kim CS [65] |                    | Namil-myon, South Korea          | 2011                 | 1532                | 55         | •      | • | • | 40+       | Rural           | 1     | 0      |
| Kim JH [66] |                    | Sangju, South Korea              | 2011                 | 671                 | 18         | •      | • | • | 50+       | Urban           | 2     | 2      |
| Liang [67]  |                    | Handan, China                    | 2011                 | 6716                | 125        | •      | • | • | 30+       | Rural           | 2     | 3      |
| Song [68]   |                    | Kailu County, Tongliao, Mongolia | 2011                 | 5158                | 73         | •      | • | • | 40+       | Rural           | 1     | 0      |
| Yoon[69]    |                    | Korean NHANES, South Korea       | 2011                 | 6561                | 256        |        |   | • | 40+       | Mixed           | 3     | 3      |

| Ethnicity       | Author             | Study name / Location, Country    | Publication Year            | Participant Numbers | POAG cases | Gender |   |   | Age range | Habitation type | ISGEO | VF/IOP |
|-----------------|--------------------|-----------------------------------|-----------------------------|---------------------|------------|--------|---|---|-----------|-----------------|-------|--------|
|                 |                    |                                   |                             |                     |            | M      | F | B |           |                 |       |        |
| South Asian     | Sun [70]           | Bin County                        | 2012                        | 4956                | 35         | •      | • | • | 40+       | Rural           | 2     | 2      |
|                 | Zhong [71]         | Yunnan Minority Eye Study         | 2012                        | 2133                | 22         | •      | • | • | 50+       | Rural           | 2     | 2      |
|                 | Li[72]             | Yongchuan Glaucoma Study, China   | 2014                        | 5938                | 51         | •      | • | • | 50+       | Urban           | 3     | 2      |
|                 | Rauf [73]          | Southall, London, UK              | 1994                        | 184                 | 5          |        |   | • | 30+       | Urban           | 3     | 0      |
|                 | Jacob [74]         | Vellore, India                    | 1998                        | 972                 | 4          |        |   | • | 30-60     | Urban           | 3     | 2      |
|                 | Dandona [75]       | Andhra Pradesh, India             | 2000                        | 1399                | 27         |        |   | • | 30-102    | Urban           | 3     | 2      |
|                 | Ramakrishnan [76]  | Aravind, India                    | 2003                        | 5150                | 64         | •      | • | • | 40-90     | Rural           | 3     | 0      |
|                 | Rahman [77]        | Dhaka, Bangladesh                 | 2004                        | 2347                | 29         |        |   | • | 35-85     | Urban           | 2     | 2      |
|                 | Raychaudhuri [78]  | South Parganas, India             | 2005                        | 1269                | 38         | •      | • | • | 50+       | Rural           | 1     | 0      |
|                 | Vijaya [79]        | Tamil Nadu, India                 | 2005                        | 3924                | 64         | •      | • | • | 40+       | Rural           | 1     | 0      |
|                 | Palimkar [80]      | Chhattisgarh, India               | 2008                        | 7438                | 37         |        |   | • | 35+       | Rural           | 3     | 2      |
|                 | Vijaya [81]        | Chennai, India                    | 2008                        | 3850                | 135        | •      | • | • | 40+       | Urban           | 1     | 0      |
|                 | Garudadri [82]     | Andhra Pradesh, India             | 2010                        | 934                 | 37         | •      | • | • | 40+       | Urban           | 2     | 2      |
|                 | Garudadri [82]     | Andhra Pradesh, India             | 2010                        | 2790                | 45         | •      | • | • | 40+       | Rural           | 2     | 2      |
|                 | Sia [83]           | Kandy, Sri Lanka                  | 2010                        | 1244                | 30         |        |   | • | 40+       | Rural           | 2     | 3      |
| Southeast Asian | Thapa [84]         | Bhaktapur Glaucoma Study          | 2012                        | 3991                | 51         | •      | • | • | 40+       | Rural           | 1     | 0      |
|                 | Nangia [85]        | Central India Eye & Medical Study | 2013                        | 4570                | 122        |        |   | • | 30+       | Rural           | 3     | 0      |
|                 | Narayanaswamy [86] | Singaporean Indian Eye Study      | 2013                        | 3400                | 46         | •      | • | • | 40-80     | Urban           | 2     | 2      |
|                 | Rauf [87]          | British Asian Community Eye Study | 2013                        | 922                 | 9          |        |   | • | 40+       | Urban           | 3     | 0      |
|                 | Foster [88]        | Tanjong Pagar, Singapore          | 2000                        | 1232                | 22         | •      | • | • | 40-81     | Urban           | 3     | 0      |
|                 | Metheetrairut [89] | Bangkok, Thailand                 | 2002                        | 2092                | 73         | •      | • | • | 60-104    | Urban           | 3     | 2      |
|                 | Bourne [90]        | Rom Klao, Bangkok, Thailand       | 2003                        | 701                 | 16         |        |   | • | 50+       | Urban           | 1     | 0      |
|                 | Casson [91]        | Meiktila, Myanmar, Burma          | 2007                        | 1997                | 39         |        |   | • | 40+       | Rural           | 2     | 3      |
|                 | Shen [92]          | Malay, Singapore                  | 2008                        | 3280                | 104        | •      | • | • | 40-80     | Urban           | 2     | 3      |
|                 | Hispanic or Latino | Quigley [93]                      | Nogales and Tucson, AZ, USA | 2001                | 4774       | 94     | • | • | •         | 41+             | Urban | 1      |
|                 | Varma [94]         | Los Angeles, CA, USA              | 2004                        | 6142                | 291        | •      | • | • | 40+       | Urban           | 3     | 0      |
| Other/Mixed     | Alsbirk [22]       | Eskimos, Greenland                | 1973                        | 396                 | 5          | •      | • | • | 40+       | Rural           | 3     | 2      |
|                 | Arkell [95]        | Eskimos, Alaska                   | 1987                        | 1686                | 1          | •      | • | • | 15+       | Rural           | 3     | 2      |



| Ethnicity | Author           | Study name / Location, Country | Publication Year | Participant Numbers | POAG cases | Gender |   |   | Age range | Habitation type | ISGEO | VF/IOP |
|-----------|------------------|--------------------------------|------------------|---------------------|------------|--------|---|---|-----------|-----------------|-------|--------|
|           |                  |                                |                  |                     |            | M      | F | B |           |                 |       |        |
|           | Salmon [96]      | Mamre, South Africa            | 1993             | 987                 | 15         | •      | • | • | 40+       | Rural           | 3     | 2      |
|           | Sakata [46]      | Piraquara City, Brazil         | 2007             | 397                 | 15         |        |   | • | 40+       | Urban           | 2     | 2      |
|           | Al-Mansouri [97] | Qatar                          | 2011             | 3149                | 44         |        |   | • | 40+       | Mixed           | 3     | 2      |
|           | Landers [98]     | Alice Springs, Australia       | 2011             | 1884                | 7          |        |   | • | 20+       | Rural           | 2     | 3      |
|           | Pakravan [99]    | Yazd Eye Study, Iran           | 2013             | 1770                | 51         |        |   | • | 40-80     | Urban           | 1     | 0      |
|           | Pakravan [99]    | Yazd Eye Study, Iran           | 2013             | 220                 | 13         |        |   | • | 40-80     | Rural           | 1     | 0      |

### Gender

M: POAG prevalence reported for males.

F: POAG prevalence reported for females.

B: POAG prevalence reported for both sexes combined.

### More information about ISGEO classification

- 1: "Follows ISGEO & VF on all" (Study design follows the ISGEO criteria and visual field assessment was performed on all participants).
- 2: "Follows ISGEO & VF on subset" (Study design follows the ISGEO criteria and visual field assessment was performed on a subset of participants limited to a proportion of subjects or only high risk subjects).
- 3: "Does not follow ISGEO" (A more conventional method of determining glaucoma using a combination of optic disc features & visual field defects).

### More information about VF/IOP classification

- 0: "VF on all" (Identification of POAG included visual field assessment on all participants and intra ocular pressure was not used as a defining criterion of POAG).
- 1: "VF on all & IOP criterion" (Identification of POAG included visual field assessment on all participants and intra ocular pressure was used as a defining criterion of POAG).
- 2: "IOP criterion & VF on subset" (Identification of POAG did not include visual field assessment on all participants and intra ocular pressure was used as a defining criterion of POAG).
- 3: "Other" (Identification of POAG did not include visual field assessment on all participants nor did POAG case definition rely on intra ocular pressure criteria).

**Supplemental Table S2.** Estimated prevalence of POAG by age (yearly), gender and ethnicity

| Age (years) | Prevalence of POAG by age and ethnicity (%) |                  |                 |                 |                 |                 |                    |                  |                 |
|-------------|---------------------------------------------|------------------|-----------------|-----------------|-----------------|-----------------|--------------------|------------------|-----------------|
|             | White                                       |                  | Black           | East Asian      | South Asian     | Southeast Asian | Hispanic or Latino | Other/Mixed      |                 |
|             | Men                                         | Women            | All             | All             | All             | All             | All                | All              |                 |
| 35          | 0.3 (0.1 , 0.8)*                            | 0.3 (0.1 , 0.7)* | 0.3 (0.2 , 0.4) | 1.7 (1.2 , 2.4) | 0.7 (0.4 , 1.0) | 0.6 (0.4 , 0.9) | 0.7 (0.3 , 1.5)*   | 0.3 (0.1 , 0.8)* | 0.5 (0.2 , 1.0) |
| 36          | 0.3 (0.1 , 0.8)*                            | 0.3 (0.1 , 0.7)* | 0.3 (0.2 , 0.4) | 1.7 (1.2 , 2.5) | 0.7 (0.5 , 1.1) | 0.6 (0.4 , 0.9) | 0.7 (0.4 , 1.6)*   | 0.4 (0.2 , 0.8)* | 0.5 (0.2 , 1.0) |
| 37          | 0.3 (0.1 , 0.9)*                            | 0.3 (0.1 , 0.8)* | 0.3 (0.2 , 0.4) | 1.8 (1.3 , 2.6) | 0.7 (0.5 , 1.1) | 0.7 (0.4 , 1.0) | 0.8 (0.4 , 1.6)*   | 0.4 (0.2 , 0.9)* | 0.5 (0.2 , 1.1) |
| 38          | 0.4 (0.1 , 0.9)*                            | 0.3 (0.1 , 0.8)* | 0.3 (0.2 , 0.5) | 1.9 (1.4 , 2.8) | 0.8 (0.5 , 1.1) | 0.7 (0.5 , 1.0) | 0.8 (0.4 , 1.7)*   | 0.4 (0.2 , 1.0)* | 0.6 (0.3 , 1.1) |
| 39          | 0.4 (0.1 , 1.0)*                            | 0.3 (0.1 , 0.9)* | 0.3 (0.2 , 0.5) | 2.0 (1.4 , 2.9) | 0.8 (0.5 , 1.2) | 0.7 (0.5 , 1.1) | 0.9 (0.4 , 1.8)*   | 0.5 (0.2 , 1.1)* | 0.6 (0.3 , 1.2) |
| 40          | 0.4 (0.2 , 1.0)*                            | 0.4 (0.1 , 0.9)* | 0.4 (0.2 , 0.5) | 2.1 (1.5 , 3.0) | 0.8 (0.5 , 1.2) | 0.8 (0.5 , 1.1) | 0.9 (0.4 , 1.8)*   | 0.5 (0.2 , 1.2)* | 0.6 (0.3 , 1.3) |
| 41          | 0.4 (0.2 , 1.1)*                            | 0.4 (0.1 , 1.0)* | 0.4 (0.3 , 0.6) | 2.2 (1.6 , 3.1) | 0.9 (0.6 , 1.3) | 0.8 (0.6 , 1.2) | 0.9 (0.5 , 1.9)*   | 0.6 (0.2 , 1.3)* | 0.7 (0.4 , 1.3) |
| 42          | 0.5 (0.2 , 1.2)                             | 0.4 (0.2 , 1.0)  | 0.4 (0.3 , 0.6) | 2.3 (1.6 , 3.3) | 0.9 (0.6 , 1.3) | 0.8 (0.6 , 1.2) | 1.0 (0.5 , 1.9)*   | 0.6 (0.3 , 1.4)* | 0.7 (0.4 , 1.4) |
| 43          | 0.5 (0.2 , 1.3)                             | 0.4 (0.2 , 1.1)  | 0.4 (0.3 , 0.6) | 2.4 (1.7 , 3.4) | 0.9 (0.6 , 1.4) | 0.9 (0.6 , 1.3) | 1.0 (0.5 , 2.0)*   | 0.7 (0.3 , 1.5)* | 0.8 (0.4 , 1.4) |
| 44          | 0.5 (0.2 , 1.3)                             | 0.5 (0.2 , 1.2)  | 0.5 (0.3 , 0.7) | 2.5 (1.8 , 3.6) | 1.0 (0.6 , 1.4) | 0.9 (0.7 , 1.3) | 1.1 (0.6 , 2.1)    | 0.7 (0.3 , 1.6)  | 0.8 (0.5 , 1.5) |
| 45          | 0.6 (0.2 , 1.4)                             | 0.5 (0.2 , 1.2)  | 0.5 (0.4 , 0.7) | 2.6 (1.9 , 3.8) | 1.0 (0.7 , 1.5) | 1.0 (0.7 , 1.4) | 1.1 (0.6 , 2.2)    | 0.8 (0.3 , 1.7)  | 0.9 (0.5 , 1.6) |
| 46          | 0.6 (0.2 , 1.5)                             | 0.5 (0.2 , 1.3)  | 0.5 (0.4 , 0.8) | 2.8 (2.0 , 3.9) | 1.0 (0.7 , 1.5) | 1.0 (0.7 , 1.5) | 1.2 (0.6 , 2.2)    | 0.8 (0.4 , 1.9)  | 1.0 (0.5 , 1.7) |
| 47          | 0.6 (0.2 , 1.6)                             | 0.5 (0.2 , 1.4)  | 0.6 (0.4 , 0.8) | 2.9 (2.1 , 4.1) | 1.1 (0.7 , 1.6) | 1.1 (0.8 , 1.6) | 1.2 (0.7 , 2.3)    | 0.9 (0.4 , 2.0)  | 1.0 (0.6 , 1.8) |
| 48          | 0.7 (0.3 , 1.7)                             | 0.6 (0.2 , 1.4)  | 0.6 (0.4 , 0.9) | 3.0 (2.2 , 4.3) | 1.1 (0.8 , 1.6) | 1.2 (0.8 , 1.6) | 1.3 (0.7 , 2.4)    | 1.0 (0.4 , 2.2)  | 1.1 (0.6 , 1.9) |
| 49          | 0.7 (0.3 , 1.8)                             | 0.6 (0.2 , 1.5)  | 0.7 (0.5 , 0.9) | 3.2 (2.3 , 4.5) | 1.2 (0.8 , 1.7) | 1.2 (0.9 , 1.7) | 1.3 (0.7 , 2.5)    | 1.1 (0.5 , 2.4)  | 1.1 (0.7 , 2.0) |
| 50          | 0.8 (0.3 , 1.9)                             | 0.6 (0.3 , 1.6)  | 0.7 (0.5 , 1.0) | 3.3 (2.4 , 4.7) | 1.2 (0.8 , 1.8) | 1.3 (0.9 , 1.8) | 1.4 (0.8 , 2.6)    | 1.2 (0.5 , 2.6)  | 1.2 (0.7 , 2.1) |
| 51          | 0.8 (0.3 , 2.0)                             | 0.7 (0.3 , 1.7)  | 0.8 (0.6 , 1.1) | 3.5 (2.5 , 4.9) | 1.3 (0.9 , 1.8) | 1.3 (1.0 , 1.9) | 1.4 (0.8 , 2.7)    | 1.3 (0.6 , 2.8)  | 1.3 (0.8 , 2.2) |
| 52          | 0.9 (0.3 , 2.2)                             | 0.7 (0.3 , 1.8)  | 0.8 (0.6 , 1.1) | 3.6 (2.6 , 5.1) | 1.3 (0.9 , 1.9) | 1.4 (1.0 , 2.0) | 1.5 (0.8 , 2.8)    | 1.4 (0.6 , 3.0)  | 1.4 (0.8 , 2.3) |
| 53          | 0.9 (0.4 , 2.3)                             | 0.8 (0.3 , 1.9)  | 0.9 (0.6 , 1.2) | 3.8 (2.7 , 5.3) | 1.4 (0.9 , 2.0) | 1.5 (1.1 , 2.1) | 1.6 (0.9 , 2.9)    | 1.5 (0.7 , 3.3)  | 1.5 (0.9 , 2.4) |
| 54          | 1.0 (0.4 , 2.5)                             | 0.8 (0.3 , 2.0)  | 0.9 (0.7 , 1.3) | 4.0 (2.9 , 5.6) | 1.4 (1.0 , 2.1) | 1.6 (1.1 , 2.2) | 1.7 (0.9 , 3.0)    | 1.6 (0.7 , 3.5)  | 1.6 (1.0 , 2.6) |
| 55          | 1.1 (0.4 , 2.6)                             | 0.9 (0.3 , 2.1)  | 1.0 (0.7 , 1.4) | 4.1 (3.0 , 5.8) | 1.5 (1.0 , 2.1) | 1.7 (1.2 , 2.3) | 1.7 (1.0 , 3.1)    | 1.8 (0.8 , 3.8)  | 1.7 (1.0 , 2.8) |
| 56          | 1.1 (0.5 , 2.8)                             | 0.9 (0.4 , 2.3)  | 1.1 (0.8 , 1.5) | 4.3 (3.1 , 6.1) | 1.5 (1.0 , 2.2) | 1.7 (1.2 , 2.5) | 1.8 (1.0 , 3.3)    | 1.9 (0.8 , 4.2)  | 1.8 (1.1 , 2.9) |
| 57          | 1.2 (0.5 , 3.0)                             | 1.0 (0.4 , 2.4)  | 1.1 (0.8 , 1.6) | 4.5 (3.3 , 6.4) | 1.6 (1.1 , 2.3) | 1.8 (1.3 , 2.6) | 1.9 (1.1 , 3.4)    | 2.1 (0.9 , 4.5)  | 1.9 (1.2 , 3.1) |
| 58          | 1.3 (0.5 , 3.2)                             | 1.0 (0.4 , 2.5)  | 1.2 (0.9 , 1.7) | 4.7 (3.4 , 6.6) | 1.7 (1.1 , 2.4) | 1.9 (1.4 , 2.7) | 2.0 (1.1 , 3.5)    | 2.3 (1.0 , 4.9)  | 2.0 (1.2 , 3.3) |
| 59          | 1.4 (0.6 , 3.4)                             | 1.1 (0.4 , 2.7)  | 1.3 (1.0 , 1.8) | 4.9 (3.6 , 6.9) | 1.7 (1.2 , 2.5) | 2.0 (1.5 , 2.9) | 2.1 (1.2 , 3.7)    | 2.4 (1.1 , 5.3)  | 2.2 (1.3 , 3.5) |

Prevalence of POAG by age and ethnicity (%)

| Age (years) | White            |                  | Black            | East Asian         | South Asian      | Southeast Asian  | Hispanic or Latino | Other/Mixed       |                    |
|-------------|------------------|------------------|------------------|--------------------|------------------|------------------|--------------------|-------------------|--------------------|
|             | Men              | Women            | All              | All                | All              | All              | All                | All               |                    |
| 60          | 1.5 (0.6 , 3.6)  | 1.2 (0.5 , 2.8)  | 1.4 (1.0 , 1.9)  | 5.2 (3.7 , 7.2)    | 1.8 (1.2 , 2.6)  | 2.1 (1.5 , 3.0)  | 2.2 (1.2 , 3.9)    | 2.7 (1.2 , 5.7)   | 2.3 (1.4 , 3.8)    |
| 61          | 1.6 (0.6 , 3.8)  | 1.2 (0.5 , 3.0)  | 1.5 (1.1 , 2.0)  | 5.4 (3.9 , 7.6)    | 1.9 (1.3 , 2.7)  | 2.3 (1.6 , 3.2)  | 2.3 (1.3 , 4.0)    | 2.9 (1.3 , 6.1)   | 2.5 (1.5 , 4.0)    |
| 62          | 1.7 (0.7 , 4.0)  | 1.3 (0.5 , 3.2)  | 1.6 (1.2 , 2.2)  | 5.6 (4.1 , 7.9)    | 1.9 (1.3 , 2.8)  | 2.4 (1.7 , 3.3)  | 2.4 (1.3 , 4.2)    | 3.1 (1.4 , 6.6)   | 2.6 (1.6 , 4.3)    |
| 63          | 1.8 (0.7 , 4.3)  | 1.4 (0.6 , 3.4)  | 1.7 (1.3 , 2.3)  | 5.9 (4.3 , 8.2)    | 2.0 (1.4 , 2.9)  | 2.5 (1.8 , 3.5)  | 2.5 (1.4 , 4.4)    | 3.4 (1.5 , 7.2)   | 2.8 (1.7 , 4.6)    |
| 64          | 1.9 (0.8 , 4.6)  | 1.5 (0.6 , 3.6)  | 1.8 (1.4 , 2.5)  | 6.2 (4.5 , 8.6)    | 2.1 (1.4 , 3.0)  | 2.6 (1.9 , 3.7)  | 2.6 (1.5 , 4.6)    | 3.7 (1.6 , 7.7)   | 3.0 (1.7 , 5.0)    |
| 65          | 2.0 (0.8 , 4.9)  | 1.6 (0.6 , 3.8)  | 2.0 (1.5 , 2.7)  | 6.4 (4.7 , 9.0)    | 2.2 (1.5 , 3.1)  | 2.8 (2.0 , 3.9)  | 2.7 (1.5 , 4.8)    | 4.0 (1.8 , 8.4)   | 3.2 (1.8 , 5.3)    |
| 66          | 2.1 (0.9 , 5.2)  | 1.7 (0.7 , 4.0)  | 2.1 (1.6 , 2.8)  | 6.7 (4.9 , 9.4)    | 2.2 (1.5 , 3.3)  | 2.9 (2.1 , 4.1)  | 2.8 (1.6 , 5.0)    | 4.3 (1.9 , 9.0)   | 3.4 (1.9 , 5.7)    |
| 67          | 2.3 (0.9 , 5.5)  | 1.8 (0.7 , 4.2)  | 2.2 (1.7 , 3.0)  | 7.0 (5.1 , 9.8)    | 2.3 (1.6 , 3.4)  | 3.1 (2.2 , 4.3)  | 2.9 (1.7 , 5.2)    | 4.7 (2.1 , 9.7)   | 3.6 (2.0 , 6.1)    |
| 68          | 2.4 (1.0 , 5.8)  | 1.9 (0.8 , 4.5)  | 2.4 (1.8 , 3.2)  | 7.3 (5.3 , 10.2)   | 2.4 (1.6 , 3.5)  | 3.2 (2.3 , 4.6)  | 3.1 (1.7 , 5.4)    | 5.1 (2.3 , 10.5)  | 3.8 (2.1 , 6.6)    |
| 69          | 2.6 (1.1 , 6.2)  | 2.0 (0.8 , 4.7)  | 2.6 (1.9 , 3.5)  | 7.7 (5.6 , 10.6)   | 2.5 (1.7 , 3.7)  | 3.4 (2.4 , 4.8)  | 3.2 (1.8 , 5.7)    | 5.5 (2.5 , 11.3)  | 4.0 (2.2 , 7.1)    |
| 70          | 2.8 (1.1 , 6.6)  | 2.1 (0.8 , 5.0)  | 2.7 (2.1 , 3.7)  | 8.0 (5.8 , 11.1)   | 2.6 (1.8 , 3.8)  | 3.6 (2.5 , 5.0)  | 3.3 (1.9 , 6.0)    | 5.9 (2.7 , 12.2)  | 4.3 (2.4 , 7.7)    |
| 71          | 2.9 (1.2 , 7.0)  | 2.2 (0.9 , 5.3)  | 2.9 (2.2 , 4.0)  | 8.4 (6.1 , 11.5)   | 2.7 (1.8 , 3.9)  | 3.8 (2.7 , 5.3)  | 3.5 (2.0 , 6.2)    | 6.4 (2.9 , 13.1)  | 4.6 (2.5 , 8.3)    |
| 72          | 3.1 (1.3 , 7.4)  | 2.3 (1.0 , 5.6)  | 3.1 (2.4 , 4.2)  | 8.7 (6.3 , 12.0)   | 2.8 (1.9 , 4.1)  | 4.0 (2.8 , 5.6)  | 3.6 (2.1 , 6.5)    | 6.9 (3.1 , 14.1)  | 4.9 (2.6 , 8.9)    |
| 73          | 3.3 (1.4 , 7.9)  | 2.5 (1.0 , 5.9)  | 3.3 (2.5 , 4.5)  | 9.1 (6.6 , 12.6)   | 2.9 (2.0 , 4.3)  | 4.2 (2.9 , 5.9)  | 3.8 (2.1 , 6.8)    | 7.5 (3.4 , 15.2)  | 5.2 (2.7 , 9.6)    |
| 74          | 3.5 (1.5 , 8.4)  | 2.6 (1.1 , 6.2)  | 3.6 (2.7 , 4.8)  | 9.5 (6.9 , 13.1)   | 3.0 (2.1 , 4.4)  | 4.4 (3.1 , 6.2)  | 4.0 (2.2 , 7.1)    | 8.1 (3.7 , 16.3)  | 5.5 (2.8 , 10.3)   |
| 75          | 3.8 (1.6 , 8.9)  | 2.8 (1.1 , 6.6)  | 3.8 (2.9 , 5.1)  | 9.9 (7.2 , 13.6)   | 3.2 (2.1 , 4.6)  | 4.6 (3.2 , 6.5)  | 4.2 (2.3 , 7.5)    | 8.7 (4.0 , 17.4)  | 5.8 (3.0 , 11.1)   |
| 76          | 4.0 (1.7 , 9.4)  | 3.0 (1.2 , 7.0)  | 4.1 (3.1 , 5.5)  | 10.3 (7.5 , 14.2)  | 3.3 (2.2 , 4.8)  | 4.8 (3.4 , 6.9)  | 4.3 (2.4 , 7.9)*   | 9.4 (4.4 , 18.7)  | 6.2 (3.1 , 12.0)   |
| 77          | 4.3 (1.8 , 10.0) | 3.1 (1.3 , 7.4)  | 4.3 (3.3 , 5.9)  | 10.8 (7.9 , 14.8)  | 3.4 (2.3 , 5.0)  | 5.1 (3.6 , 7.2)  | 4.5 (2.5 , 8.2)*   | 10.2 (4.7 , 20.0) | 6.6 (3.2 , 12.9)   |
| 78          | 4.5 (1.9 , 10.6) | 3.3 (1.3 , 7.8)  | 4.6 (3.5 , 6.3)  | 11.2 (8.2 , 15.4)  | 3.5 (2.4 , 5.2)  | 5.4 (3.7 , 7.6)  | 4.7 (2.6 , 8.6)*   | 11.0 (5.1 , 21.4) | 7.0 (3.4 , 13.9)   |
| 79          | 4.8 (2.0 , 11.3) | 3.5 (1.4 , 8.3)  | 5.0 (3.7 , 6.7)  | 11.7 (8.6 , 16.0)  | 3.7 (2.5 , 5.4)  | 5.6 (3.9 , 8.0)  | 4.9 (2.7 , 9.0)*   | 11.8 (5.5 , 22.9) | 7.4 (3.5 , 14.9)   |
| 80          | 5.1 (2.1 , 12.0) | 3.7 (1.5 , 8.7)  | 5.3 (4.0 , 7.1)  | 12.2 (8.9 , 16.6)  | 3.8 (2.6 , 5.6)  | 5.9 (4.1 , 8.4)  | 5.1 (2.8 , 9.5)*   | 12.7 (6.0 , 24.4) | 7.9 (3.7 , 16.0)   |
| 81          | 5.5 (2.3 , 12.7) | 3.9 (1.6 , 9.2)  | 5.6 (4.2 , 7.6)  | 12.7 (9.3 , 17.3)  | 4.0 (2.7 , 5.8)  | 6.2 (4.3 , 8.8)  | 5.4 (2.9 , 9.9)*   | 13.7 (6.4 , 26.0) | 8.3 (3.8 , 17.2)*  |
| 82          | 5.8 (2.4 , 13.4) | 4.2 (1.7 , 9.8)  | 6.0 (4.5 , 8.1)  | 13.2 (9.7 , 18.0)  | 4.1 (2.8 , 6.0)  | 6.5 (4.5 , 9.3)  | 5.6 (3.0 , 10.4)*  | 14.7 (7.0 , 27.7) | 8.9 (4.0 , 18.4)*  |
| 83          | 6.2 (2.6 , 14.2) | 4.4 (1.8 , 10.3) | 6.4 (4.8 , 8.7)  | 13.8 (10.1 , 18.7) | 4.3 (2.9 , 6.3)  | 6.8 (4.8 , 9.8)  | 5.8 (3.1 , 11.0)*  | 15.8 (7.5 , 29.4) | 9.4 (4.1 , 19.8)*  |
| 84          | 6.6 (2.7 , 15.1) | 4.7 (1.9 , 10.9) | 6.9 (5.1 , 9.2)  | 14.3 (10.5 , 19.4) | 4.4 (3.0 , 6.5)  | 7.2 (5.0 , 10.3) | 6.1 (3.2 , 11.5)*  | 16.9 (8.1 , 31.2) | 9.9 (4.3 , 21.2)*  |
| 85          | 7.0 (2.9 , 15.9) | 4.9 (2.0 , 11.5) | 7.3 (5.5 , 9.8)  | 14.9 (10.9 , 20.2) | 4.6 (3.1 , 6.8)  | 7.6 (5.2 , 10.8) | 6.4 (3.3 , 12.1)*  | 18.2 (8.7 , 33.1) | 10.5 (4.5 , 22.7)* |
| 86          | 7.4 (3.1 , 16.9) | 5.2 (2.1 , 12.1) | 7.8 (5.8 , 10.5) | 15.5 (11.4 , 21.0) | 4.8 (3.2 , 7.0)* | 7.9 (5.5 , 11.3) | 6.6 (3.4 , 12.6)*  | 19.4 (9.4 , 35.0) | 11.2 (4.7 , 24.3)* |

| Age (years) | Prevalence of POAG by age and ethnicity (%) |                    |                     |                     |                   |                     |                    |                     |                    |
|-------------|---------------------------------------------|--------------------|---------------------|---------------------|-------------------|---------------------|--------------------|---------------------|--------------------|
|             |                                             | White              |                     | Black               | East Asian        | South Asian         | Southeast Asian    | Hispanic or Latino  | Other/Mixed        |
|             | Men                                         | Women              | All                 | All                 | All               | All                 | All                | All                 | All                |
| 87          | 7.9 (3.3 , 17.8)                            | 5.5 (2.3 , 12.8)   | 8.3 (6.2 , 11.2)    | 16.1 (11.9 , 21.7)  | 5.0 (3.3 , 7.3)*  | 8.3 (5.7 , 11.9)*   | 6.9 (3.5 , 13.3)*  | 20.8 (10.2 , 36.9)  | 11.8 (4.8 , 25.9)* |
| 88          | 8.3 (3.5 , 18.8)                            | 5.8 (2.4 , 13.5)   | 8.8 (6.6 , 11.9)    | 16.7 (12.3 , 22.6)  | 5.1 (3.4 , 7.6)*  | 8.7 (6.0 , 12.5)*   | 7.2 (3.6 , 13.9)*  | 22.2 (10.9 , 39.0)  | 12.5 (5.0 , 27.7)* |
| 89          | 8.8 (3.7 , 19.9)                            | 6.2 (2.5 , 14.2)   | 9.4 (7.0 , 12.7)    | 17.4 (12.8 , 23.4)  | 5.3 (3.5 , 7.9)*  | 9.2 (6.3 , 13.1)*   | 7.5 (3.7 , 14.6)*  | 23.7 (11.8 , 41.0)  | 13.2 (5.2 , 29.4)* |
| 90          | 9.4 (3.9 , 21.0)                            | 6.5 (2.7 , 15.0)   | 10.0 (7.4 , 13.5)   | 18.1 (13.4 , 24.3)  | 5.5 (3.7 , 8.2)*  | 9.6 (6.6 , 13.8)*   | 7.8 (3.9 , 15.3)*  | 25.2 (12.7 , 43.1)  | 14.0 (5.4 , 31.3)* |
| 91          | 10.0 (4.2 , 22.1)                           | 6.9 (2.8 , 15.8)   | 10.7 (7.9 , 14.3)   | 18.8 (13.9 , 25.2)  | 5.7 (3.8 , 8.5)*  | 10.1 (6.9 , 14.5)*  | 8.2 (4.0 , 16.0)*  | 26.8 (13.7 , 45.2)  | 14.8 (5.6 , 33.3)* |
| 92          | 10.6 (4.4 , 23.3)                           | 7.3 (3.0 , 16.6)   | 11.3 (8.4 , 15.2)   | 19.5 (14.4 , 26.1)  | 6.0 (3.9 , 8.8)*  | 10.6 (7.2 , 15.2)*  | 8.5 (4.1 , 16.8)*  | 28.5 (14.6 , 47.3)  | 15.6 (5.9 , 35.3)* |
| 93          | 11.2 (4.7 , 24.5)                           | 7.7 (3.1 , 17.5)   | 12.0 (8.9 , 16.1)   | 20.3 (15.0 , 27.0)  | 6.2 (4.1 , 9.2)*  | 11.1 (7.5 , 15.9)*  | 8.9 (4.2 , 17.6)*  | 30.3 (15.7 , 49.5)  | 16.5 (6.1 , 37.4)* |
| 94          | 11.9 (5.0 , 25.8)                           | 8.1 (3.3 , 18.4)   | 12.8 (9.5 , 17.1)   | 21.0 (15.6 , 28.0)  | 6.4 (4.2 , 9.5)*  | 11.6 (7.8 , 16.7)*  | 9.2 (4.4 , 18.4)*  | 32.1 (16.8 , 51.6)  | 17.4 (6.3 , 39.5)* |
| 95          | 12.6 (5.3 , 27.1)                           | 8.6 (3.5 , 19.4)   | 13.6 (10.1 , 18.1)  | 21.8 (16.2 , 29.0)  | 6.6 (4.4 , 9.9)*  | 12.1 (8.2 , 17.5)*  | 9.6 (4.5 , 19.3)*  | 33.9 (18.0 , 53.7)  | 18.3 (6.6 , 41.6)* |
| 96          | 13.3 (5.6 , 28.5)*                          | 9.0 (3.7 , 20.3)*  | 14.4 (10.7 , 19.2)* | 22.6 (16.8 , 30.0)  | 6.9 (4.5 , 10.3)* | 12.7 (8.6 , 18.3)*  | 10.0 (4.7 , 20.2)* | 35.8 (19.2 , 55.9)* | 19.3 (6.8 , 43.8)* |
| 97          | 14.1 (5.9 , 29.9)*                          | 9.5 (3.9 , 21.4)*  | 15.3 (11.3 , 20.3)* | 23.4 (17.5 , 31.0)  | 7.2 (4.7 , 10.7)* | 13.3 (8.9 , 19.2)*  | 10.4 (4.8 , 21.1)* | 37.7 (20.5 , 58.0)* | 20.3 (7.1 , 46.0)* |
| 98          | 14.9 (6.3 , 31.4)*                          | 10.1 (4.1 , 22.4)* | 16.2 (12.0 , 21.5)* | 24.3 (18.1 , 32.0)  | 7.4 (4.8 , 11.1)* | 13.9 (9.3 , 20.0)*  | 10.9 (4.9 , 22.1)* | 39.8 (21.8 , 60.1)* | 21.4 (7.3 , 48.3)* |
| 99          | 15.7 (6.7 , 32.9)*                          | 10.6 (4.4 , 23.6)* | 17.1 (12.7 , 22.7)* | 25.1 (18.8 , 33.1)* | 7.7 (5.0 , 11.5)* | 14.6 (9.8 , 21.0)*  | 11.3 (5.1 , 23.2)* | 41.8 (23.2 , 62.1)* | 22.5 (7.6 , 50.5)* |
| 100         | 16.6 (7.0 , 34.5)*                          | 11.2 (4.6 , 24.7)* | 18.1 (13.4 , 24.0)* | 26.0 (19.5 , 34.2)* | 8.0 (5.2 , 11.9)* | 15.2 (10.2 , 21.9)* | 11.8 (5.2 , 24.2)* | 43.8 (24.7 , 64.2)* | 23.6 (7.9 , 52.8)* |

Estimates correspond to prevalence (%) and 95% CrI, and are standardised to surveys that performed visual field assessment on all participants.

\* Estimates obtained by extrapolation from the fitted model.

## **SUPPLEMENTAL FIGURES**

### **Figure legends**

Supplemental Figure S1: Article selection process (QUOROM statement)

Supplemental Figure S2: Global estimates of the number of POAG cases in 2015

Supplemental Figure S3: Global estimates of the number of POAG cases in 2020

Supplemental Figure S4: Global estimates of the number of POAG cases in 2025

**Supplemental Figure S1: Article selection process (QUOROM statement)**

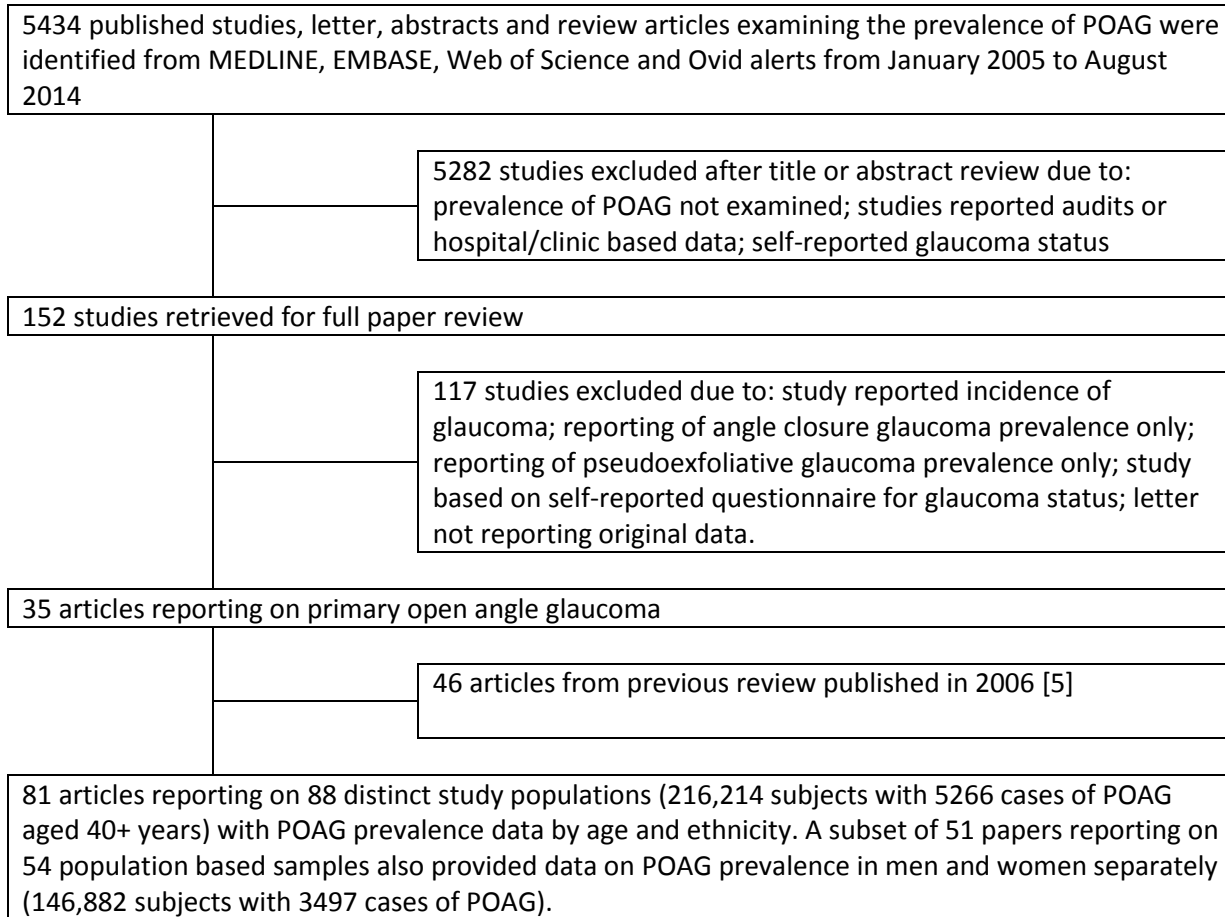

Supplemental Figure S2: Global estimates of the number of POAG cases in 2015

# Global estimate of 57.5million POAG cases worldwide in 2015

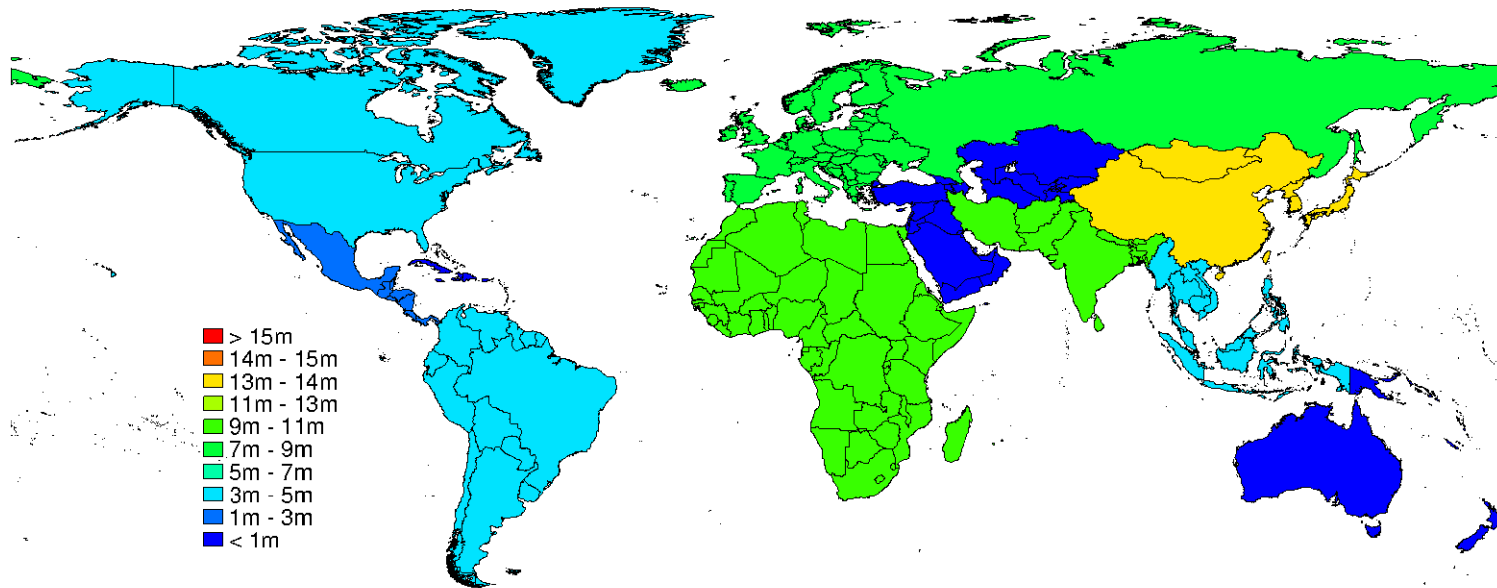

Supplemental Figure S3: Global estimates of the number of POAG cases in 2020

# Global estimate of 65.5million POAG cases worldwide in 2020

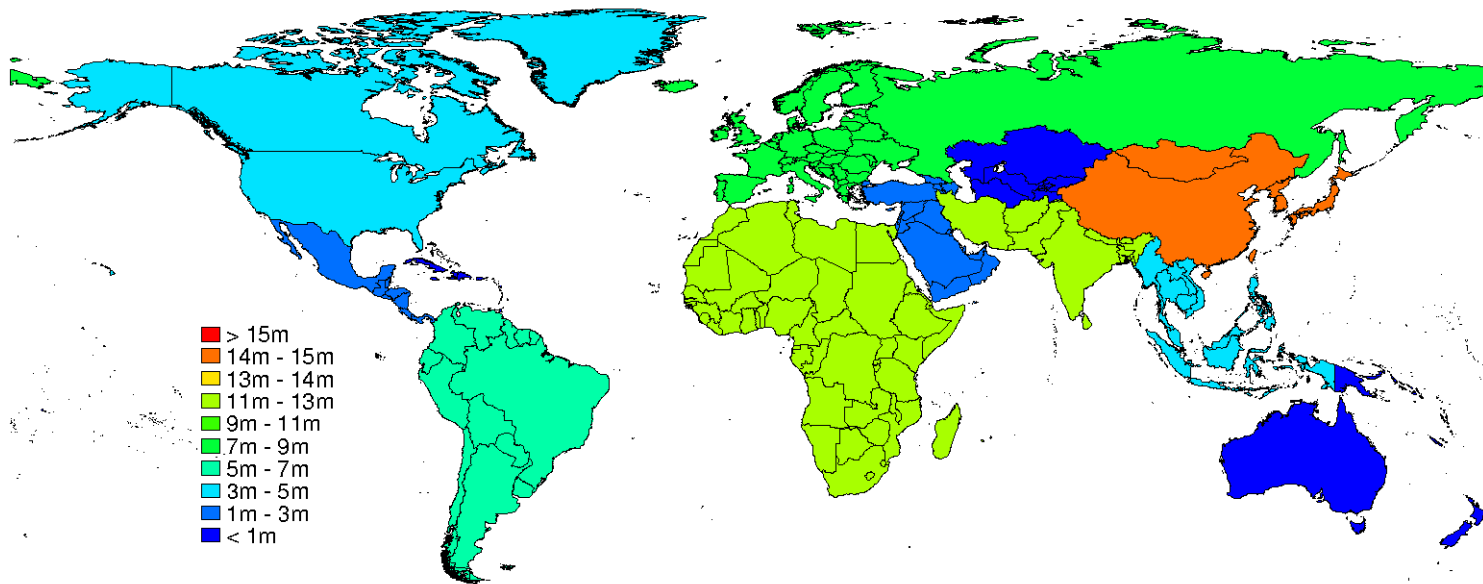



Supplemental Figure S4: Global estimates of the number of POAG cases in 2025

# Global estimate of 74.6million POAG cases worldwide in 2025

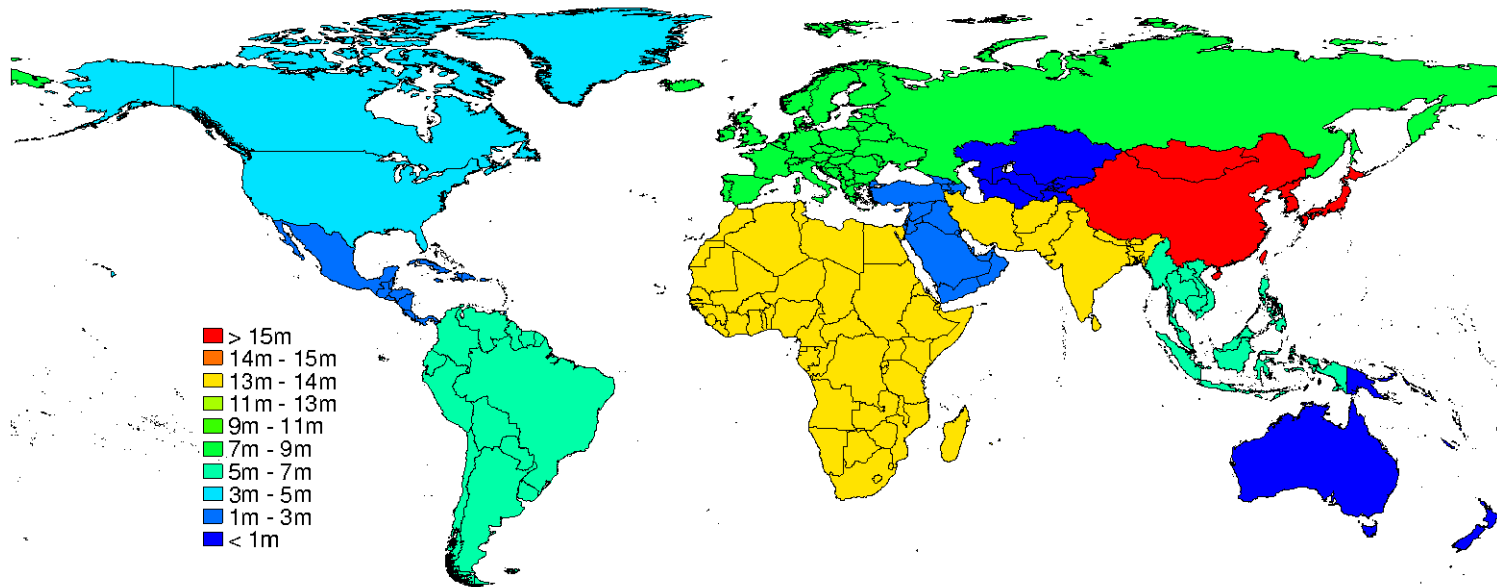

## REFERENCE LIST (INCLUDING ADDITIONAL REFERENCES IN SUPPL TABLE S1)

1. World Health Organization. Visual impairment and blindness: Fact Sheet No 282. [Accessed September 2014] . 2014.
2. Quigley HA, Broman AT. The number of people with glaucoma worldwide in 2010 and 2020. *Br.J Ophthalmol.* 2006;**90**:262-7.
3. Tham YC, Li X, Wong TY, Quigley HA, Aung T, Cheng CY. Global Prevalence of Glaucoma and Projections of Glaucoma Burden through 2040: A Systematic Review and Meta-Analysis. *Ophthalmology* 2014;**121**:2081-90.
4. Friedman DS, Wolfs RC, O'Colmain BJ, Klein BE, Taylor HR, West S et al. Prevalence of open-angle glaucoma among adults in the United States. *Arch.Ophthalmol.* 2004;**122**:532-8.
5. Rudnicka AR, Mt-Isa S, Owen CG, Cook DG, Ashby D. Variations in primary open-angle glaucoma prevalence by age, gender, and race: a Bayesian meta-analysis. *Invest Ophthalmol.Vis.Sci.* 2006;**47**:4254-61.
6. Foster PJ, Buhrmann R, Quigley HA, Johnson GJ. The definition and classification of glaucoma in prevalence surveys. *Br.J Ophthalmol.* 2002;**86**:238-42.
7. Stroup DF, Berlin JA, Morton SC, Olkin I, Williamson GD, Rennie D et al. Meta-analysis of observational studies in epidemiology: a proposal for reporting. Meta-analysis Of Observational Studies in Epidemiology (MOOSE) group. *JAMA* 2000;**283**:2008-12.
8. Lunn D, Spiegelhalter D, Thomas A, Best N. The BUGS project: Evolution, critique, and future directions. *Statistics in Medicine* 2009;**28**:3049-67.

9. R Core Team. R: A Language and Environment for Statistical Computing. 2014. R Foundation for Statistical Computing, Vienna, Austria. 21-4-2015.
10. United Nations. World Population Prospects: The 2012 Revision. [Accessed September 2014] . 2012.
11. Friedman DS, Jampel HD, Munoz B, West SK. The prevalence of open-angle glaucoma among blacks and whites 73 years and older: the Salisbury Eye Evaluation Glaucoma Study. *Arch.Ophthalmol.* 2006;**124**:1625-30.
12. Tielsch JM, Sommer A, Katz J, Royall RM, Quigley HA, Javitt J. Racial variations in the prevalence of primary open-angle glaucoma. The Baltimore Eye Survey. *JAMA* 1991;**266**:369-74.
13. Chaturvedi N. Ethnic differences in cardiovascular disease. *Heart* 2003;**89**:681-6.
14. Wild SH, Fischbacher C, Brock A, Griffiths C, Bhopal R. Mortality from all causes and circulatory disease by country of birth in England and Wales 2001-2003. *J Public Health (Oxf)* 2007;**29**:191-8.
15. Roger VL, Go AS, Lloyd-Jones DM, Benjamin EJ, Berry JD, Borden WB et al. Executive summary: heart disease and stroke statistics--2012 update: a report from the American Heart Association. *Circulation* 2012;**125**:188-97.
16. Yanagi M, Kawasaki R, Wang JJ, Wong TY, Crowston J, Kiuchi Y. Vascular risk factors in glaucoma: a review. *Clin.Experiment.Ophthalmol.* 2011;**39**:252-8.
17. Lee DJ, Gomez-Marin O, Lam BL, Zheng DD. Glaucoma and survival: the National Health Interview Survey 1986-1994. *Ophthalmology* 2003;**110**:1476-83.

18. Klein R, Klein BE. The prevalence of age-related eye diseases and visual impairment in aging: current estimates. *Invest Ophthalmol.Vis.Sci.* 2013;**54**:ORSF5-ORSF13.
19. Khawaja AP, Chan MP, Garway-Heath DF, Broadway DC, Luben R, Sherwin JC et al. Associations with retinal nerve fiber layer measures in the EPIC-Norfolk Eye Study. *Invest Ophthalmol.Vis.Sci.* 2013;**54**:5028-34.
20. Pasquale LR, Rosner BA, Hankinson SE, Kang JH. Attributes of female reproductive aging and their relation to primary open-angle glaucoma: a prospective study. *J Glaucoma.* 2007;**16**:598-605.
21. Hu CN. An epidemiologic study of glaucoma in Shunyi County, Beijing. *Zhonghua Yan.Ke.Za Zhi.* 1989;**25**:115-9.
22. Alsbirk PH. Angle-closure glaucoma surveys in Greenland Eskimos. A preliminary report. *Can.J Ophthalmol.* 1973;**8**:260-4.
23. Hirvela H, Tuulonen A, Laatikainen L. Intraocular pressure and prevalence of glaucoma in elderly people in Finland: a population-based study. *Int Ophthalmol.* 1994;**18**:299-307.
24. Hollows FC, Graham PA. Intra-ocular pressure, glaucoma, and glaucoma suspects in a defined population. *Br.J Ophthalmol.* 1966;**50**:570-86.
25. Bankes JL, Perkins ES, Tsolakis S, Wright JE. Bedford glaucoma survey. *Br.Med.J* 1968;**1**:791-6.
26. Leibowitz HM, Krueger DE, Maunder LR, Milton RC, Kini MM, Kahn HA et al. The Framingham Eye Study monograph: An ophthalmological and epidemiological study

- of cataract, glaucoma, diabetic retinopathy, macular degeneration, and visual acuity in a general population of 2631 adults, 1973-1975. *Surv.Ophthalmol.* 1980;**24**:335-610.
27. Bengtsson B. The prevalence of glaucoma. *Br.J Ophthalmol.* 1981;**65**:46-9.
  28. Martinez GS, Campbell AJ, Reinken J, Allan BC. Prevalence of ocular disease in a population study of subjects 65 years old and older. *Am.J Ophthalmol.* 1982;**94**:181-9.
  29. Gibson JM, Rosenthal AR, Lavery J. A study of the prevalence of eye disease in the elderly in an English community. *Trans.Ophthalmol.Soc.U.K.* 1985;**104 ( Pt 2)**:196-203.
  30. Ringvold A, Blika S, Elsas T, Guldahl J, Brevik T, Hesstvedt P et al. The middle-Norway eye-screening study. II. Prevalence of simple and capsular glaucoma. *Acta Ophthalmol.(Copenh)* 1991;**69**:273-80.
  31. Klein BE, Klein R, Sponsel WE, Franke T, Cantor LB, Martone J et al. Prevalence of glaucoma. The Beaver Dam Eye Study. *Ophthalmology* 1992;**99**:1499-504.
  32. Coffey M, Reidy A, Wormald R, Xian WX, Wright L, Courtney P. Prevalence of glaucoma in the west of Ireland. *Br.J Ophthalmol.* 1993;**77**:17-21.
  33. Dielemans I, Vingerling JR, Wolfs RC, Hofman A, Grobbee DE, de Jong PT. The prevalence of primary open-angle glaucoma in a population-based study in The Netherlands. The Rotterdam Study. *Ophthalmology* 1994;**101**:1851-5.

34. Leske MC, Connell AM, Schachat AP, Hyman L. The Barbados Eye Study. Prevalence of open angle glaucoma. *Arch.Ophthalmol.* 1994;**112**:821-9.
35. Giuffre G, Giammanco R, Dardanoni G, Ponte F. Prevalence of glaucoma and distribution of intraocular pressure in a population. The Casteldaccia Eye Study. *Acta Ophthalmol.Scand.* 1995;**73**:222-5.
36. Ekstrom C. Prevalence of open-angle glaucoma in central Sweden. The Tierp Glaucoma Survey. *Acta Ophthalmol.Scand.* 1996;**74**:107-12.
37. Mitchell P, Smith W, Attebo K, Healey PR. Prevalence of open-angle glaucoma in Australia. The Blue Mountains Eye Study. *Ophthalmology* 1996;**103**:1661-9.
38. Cedrone C, Culasso F, Cesareo M, Zapelloni A, Cedrone P, Cerulli L. Prevalence of glaucoma in Ponza, Italy: a comparison with other studies. *Ophthalmic Epidemiol.* 1997;**4**:59-72.
39. Bonomi L, Marchini G, Marraffa M, Bernardi P, De F, I, Perfetti S et al. Prevalence of glaucoma and intraocular pressure distribution in a defined population. The Egna-Neumarkt Study. *Ophthalmology* 1998;**105**:209-15.
40. Reidy A, Minassian DC, Vafidis G, Joseph J, Farrow S, Wu J et al. Prevalence of serious eye disease and visual impairment in a north London population: population based, cross sectional study. *BMJ* 1998;**316**:1643-6.
41. Kozobolis VP, Detorakis ET, Tsilimbaris M, Siganos DS, Vlachonikolis IG, Pallikaris IG. Crete, Greece glaucoma study. *J Glaucoma.* 2000;**9**:143-9.

42. Weih LM, Nanjan M, McCarty CA, Taylor HR. Prevalence and predictors of open-angle glaucoma: results from the visual impairment project. *Ophthalmology* 2001;**108**:1966-72.
43. Anton A, Andrada MT, Mujica V, Calle MA, Portela J, Mayo A. Prevalence of primary open-angle glaucoma in a Spanish population: the Segovia study. *J Glaucoma*. 2004;**13**:371-6.
44. Nizankowska MH, Kaczmarek R. Prevalence of glaucoma in the wroclaw population. The wroclaw epidemiological study. *Ophthalmic Epidemiol*. 2005;**12**:363-71.
45. Astrom S, Linden C. Incidence and prevalence of pseudoexfoliation and open-angle glaucoma in northern Sweden: I. Baseline report. *Acta Ophthalmol.Scand*. 2007;**85**:828-31.
46. Sakata K, Sakata LM, Sakata VM, Santini C, Hopker LM, Bernardes R et al. Prevalence of glaucoma in a South brazilian population: Projeto Glaucoma. *Invest Ophthalmol.Vis.Sci*. 2007;**48**:4974-9.
47. Topouzis F, Wilson MR, Harris A, Anastasopoulos E, Yu F, Mavroudis L et al. Prevalence of open-angle glaucoma in Greece: the Thessaloniki Eye Study. *Am.J Ophthalmol*. 2007;**144**:511-9.
48. Arnarsson AM. Epidemiology of exfoliation syndrome in the Reykjavik Eye Study. *Acta Ophthalmol*. 2009;**87 Thesis 3**:1-17.
49. Wallace J, Lovell HG. Glaucoma and intraocular pressure in Jamaica. *Am.J Ophthalmol*. 1969;**67**:93-100.

50. Mason RP, Kosoko O, Wilson MR, Martone JF, Cowan CL, Jr., Gear JC et al. National survey of the prevalence and risk factors of glaucoma in St. Lucia, West Indies. Part I. Prevalence findings. *Ophthalmology* 1989;**96**:1363-8.
51. Wormald RP, Basauri E, Wright LA, Evans JR. The African Caribbean Eye Survey: risk factors for glaucoma in a sample of African Caribbean people living in London. *Eye (Lond)* 1994;**8 ( Pt 3)**:315-20.
52. Buhrmann RR, Quigley HA, Barron Y, West SK, Oliva MS, Mmbaga BB. Prevalence of glaucoma in a rural East African population. *Invest Ophthalmol.Vis.Sci.* 2000;**41**:40-8.
53. Ekwerekwu CM, Umeh RE. The prevalence of glaucoma in an onchoendemic community in South-Eastern Nigeria. *West Afr.J Med.* 2002;**21**:200-3.
54. Rotchford AP, Johnson GJ. Glaucoma in Zulus: a population-based cross-sectional survey in a rural district in South Africa. *Arch.Ophthalmol.* 2002;**120**:471-8.
55. Rotchford AP, Kirwan JF, Muller MA, Johnson GJ, Roux P. Temba glaucoma study: a population-based cross-sectional survey in urban South Africa. *Ophthalmology* 2003;**110**:376-82.
56. Ntim-Amponsah CT, Amoaku WM, Ofosu-Amaah S, Ewusi RK, Idirisuriya-Khair R, Nyatepe-Coo E et al. Prevalence of glaucoma in an African population. *Eye (Lond)* 2004;**18**:491-7.
57. Ashaye A, Ashaolu O, Komolafe O, Ajayi BG, Olawoye O, Olusanya B et al. Prevalence and types of glaucoma among an indigenous African population in southwestern Nigeria. *Invest Ophthalmol.Vis.Sci.* 2013;**54**:7410-6.



58. Budenz DL, Barton K, Whiteside-de VJ, Schiffman J, Bandi J, Nolan W et al.  
Prevalence of glaucoma in an urban West African population: the Tema Eye Survey.  
*JAMA Ophthalmol.* 2013;**131**:651-8.
59. Shiose Y, Kitazawa Y, Tsukahara S, Akamatsu T, Mizokami K, Futa R et al.  
Epidemiology of glaucoma in Japan--a nationwide glaucoma survey. *Jpn.J  
Ophthalmol.* 1991;**35**:133-55.
60. Foster PJ, Baasanhu J, Alsbirk PH, Munkhbayar D, Uranchimeg D, Johnson GJ.  
Glaucoma in Mongolia. A population-based survey in Hovsgol province, northern  
Mongolia. *Arch.Ophthalmol.* 1996;**114**:1235-41.
61. Iwase A, Suzuki Y, Araie M, Yamamoto T, Abe H, Shirato S et al. The prevalence of  
primary open-angle glaucoma in Japanese: the Tajimi Study. *Ophthalmology*  
2004;**111**:1641-8.
62. He M, Foster PJ, Ge J, Huang W, Zheng Y, Friedman DS et al. Prevalence and clinical  
characteristics of glaucoma in adult Chinese: a population-based study in Liwan  
District, Guangzhou. *Invest Ophthalmol.Vis.Sci.* 2006;**47**:2782-8.
63. Ohkubo S, Takeda H, Higashide T, Sasaki T, Sugiyama K. A pilot study to detect  
glaucoma with confocal scanning laser ophthalmoscopy compared with  
nonmydriatic stereoscopic photography in a community health screening. *J  
Glaucoma.* 2007;**16**:531-8.
64. Wang YX, Xu L, Yang H, Jonas JB. Prevalence of glaucoma in North China: the Beijing  
Eye Study. *Am.J Ophthalmol.* 2010;**150**:917-24.

65. Kim CS, Seong GJ, Lee NH, Song KC. Prevalence of primary open-angle glaucoma in central South Korea the Namil study. *Ophthalmology* 2011;**118**:1024-30.
66. Kim JH, Kang SY, Kim NR, Lee ES, Hong S, Seong GJ et al. Prevalence and characteristics of glaucoma among Korean adults. *Korean J Ophthalmol.* 2011;**25**:110-5.
67. Liang YB, Friedman DS, Zhou Q, Yang X, Sun LP, Guo LX et al. Prevalence of primary open angle glaucoma in a rural adult Chinese population: the Handan eye study. *Invest Ophthalmol.Vis.Sci.* 2011;**52**:8250-7.
68. Song W, Shan L, Cheng F, Fan P, Zhang L, Qu W et al. Prevalence of glaucoma in a rural northern china adult population: a population-based survey in kailu county, inner mongolia. *Ophthalmology* 2011;**118**:1982-8.
69. Yoon KC, Mun GH, Kim SD, Kim SH, Kim CY, Park KH et al. Prevalence of eye diseases in South Korea: data from the Korea National Health and Nutrition Examination Survey 2008-2009. *Korean J Ophthalmol* 2011;**25**:421-33.
70. Sun J, Zhou X, Kang Y, Yan L, Sun X, Sui H et al. Prevalence and risk factors for primary open-angle glaucoma in a rural northeast China population: a population-based survey in Bin County, Harbin. *Eye (Lond)* 2012;**26**:283-91.
71. Zhong H, Li J, Li C, Wei T, Cha X, Cai N et al. The prevalence of glaucoma in adult rural Chinese populations of the Bai nationality in Dali: the Yunnan Minority Eye Study. *Invest Ophthalmol.Vis.Sci.* 2012;**53**:3221-5.

72. Li H, Zhang YY, Liu SC, He XG, Li CJ, Li CH et al. Prevalence of open-angle glaucoma in southwestern China: the Yongchuan Glaucoma study. *J Huazhong.Univ Sci.Technolog.Med.Sci.* 2014;**34**:137-41.
73. Rauf A, Ong PS, Pearson RV, Wormald RP. A pilot study into the prevalence of ophthalmic disease in the Indian population of Southall. *J R.Soc.Med.* 1994;**87**:78-9.
74. Jacob A, Thomas R, Koshi SP, Braganza A, Muliyl J. Prevalence of primary glaucoma in an urban south Indian population. *Indian J Ophthalmol.* 1998;**46**:81-6.
75. Dandona L, Dandona R, Srinivas M, Mandal P, John RK, McCarty CA et al. Open-angle glaucoma in an urban population in southern India: the Andhra Pradesh eye disease study. *Ophthalmology* 2000;**107**:1702-9.
76. Ramakrishnan R, Nirmalan PK, Krishnadas R, Thulasiraj RD, Tielsch JM, Katz J et al. Glaucoma in a rural population of southern India: the Aravind comprehensive eye survey. *Ophthalmology* 2003;**110**:1484-90.
77. Rahman MM, Rahman N, Foster PJ, Haque Z, Zaman AU, Dineen B et al. The prevalence of glaucoma in Bangladesh: a population based survey in Dhaka division. *Br.J Ophthalmol.* 2004;**88**:1493-7.
78. Raychaudhuri A, Lahiri SK, Bandyopadhyay M, Foster PJ, Reeves BC, Johnson GJ. A population based survey of the prevalence and types of glaucoma in rural West Bengal: the West Bengal Glaucoma Study. *Br.J Ophthalmol.* 2005;**89**:1559-64.

79. Vijaya L, George R, Paul PG, Baskaran M, Arvind H, Raju P et al. Prevalence of open-angle glaucoma in a rural south Indian population. *Invest Ophthalmol. Vis. Sci.* 2005;**46**:4461-7.
80. Palimkar A, Khandekar R, Venkataraman V. Prevalence and distribution of glaucoma in central India (Glaucoma Survey 2001). *Indian J Ophthalmol.* 2008;**56**:57-62.
81. Vijaya L, George R, Baskaran M, Arvind H, Raju P, Ramesh SV et al. Prevalence of primary open-angle glaucoma in an urban south Indian population and comparison with a rural population. The Chennai Glaucoma Study. *Ophthalmology* 2008;**115**:648-54.
82. Garudadri C, Senthil S, Khanna RC, Sannapaneni K, Rao HB. Prevalence and risk factors for primary glaucomas in adult urban and rural populations in the Andhra Pradesh Eye Disease Study. *Ophthalmology* 2010;**117**:1352-9.
83. Sia DI, Edussuriya K, Sennanayake S, Senaratne T, Selva D, Casson RJ. Prevalence of and risk factors for primary open-angle glaucoma in central Sri Lanka: the Kandy eye study. *Ophthalmic Epidemiol.* 2010;**17**:211-6.
84. Thapa SS, Paudyal I, Khanal S, Twyana SN, Paudyal G, Gurung R et al. A population-based survey of the prevalence and types of glaucoma in Nepal: the Bhaktapur Glaucoma Study. *Ophthalmology* 2012;**119**:759-64.
85. Nangia V, Jonas JB, Matin A, Bhojwani K, Sinha A, Kulkarni M et al. Prevalence and associated factors of glaucoma in rural central India. The Central India Eye and Medical Study. *PLoS. One.* 2013;**8**:e76434.

86. Narayanaswamy A, Baskaran M, Zheng Y, Lavanya R, Wu R, Wong WL et al. The prevalence and types of glaucoma in an urban Indian population: the Singapore Indian Eye Study. *Invest Ophthalmol.Vis.Sci.* 2013;**54**:4621-7.
87. Rauf A, Malik R, Bunce C, Wormald R. The British Asian community eye study: outline of results on the prevalence of eye disease in British Asians with origins from the Indian subcontinent. *Indian J Ophthalmol.* 2013;**61**:53-8.
88. Foster PJ, Oen FT, Machin D, Ng TP, Devereux JG, Johnson GJ et al. The prevalence of glaucoma in Chinese residents of Singapore: a cross-sectional population survey of the Tanjong Pagar district. *Arch.Ophthalmol.* 2000;**118**:1105-11.
89. Metheetrairut A, Singalavanija A, Ruangvaravate N, Tuchinda R. Evaluation of screening tests and prevalence of glaucoma: integrated health research program for the Thai elderly. *J Med.Assoc.Thai.* 2002;**85**:147-53.
90. Bourne RR, Sukodom P, Foster PJ, Tantisevi V, Jitapunkul S, Lee PS et al. Prevalence of glaucoma in Thailand: a population based survey in Rom Klao District, Bangkok. *Br.J Ophthalmol.* 2003;**87**:1069-74.
91. Casson RJ, Newland HS, Muecke J, McGovern S, Abraham L, Shein WK et al. Prevalence of glaucoma in rural Myanmar: the Meiktila Eye Study. *Br.J Ophthalmol.* 2007;**91**:710-4.
92. Shen SY, Wong TY, Foster PJ, Loo JL, Rosman M, Loon SC et al. The prevalence and types of glaucoma in malay people: the Singapore Malay eye study. *Invest Ophthalmol.Vis.Sci.* 2008;**49**:3846-51.

93. Quigley HA, West SK, Rodriguez J, Munoz B, Klein R, Snyder R. The prevalence of glaucoma in a population-based study of Hispanic subjects: Proyecto VER. *Arch.Ophthalmol.* 2001;**119**:1819-26.
94. Varma R, Ying-Lai M, Francis BA, Nguyen BB, Deneen J, Wilson MR et al. Prevalence of open-angle glaucoma and ocular hypertension in Latinos: the Los Angeles Latino Eye Study. *Ophthalmology* 2004;**111**:1439-48.
95. Arkell SM, Lightman DA, Sommer A, Taylor HR, Korshin OM, Tielsch JM. The prevalence of glaucoma among Eskimos of northwest Alaska. *Arch.Ophthalmol.* 1987;**105**:482-5.
96. Salmon JF, Mermoud A, Ivey A, Swanevelder SA, Hoffman M. The prevalence of primary angle closure glaucoma and open angle glaucoma in Mamre, western Cape, South Africa. *Arch.Ophthalmol.* 1993;**111**:1263-9.
97. Al-Mansouri FA, Kanaan A, Gamra H, Khandekar R, Hashim SP, Al QO et al. Prevalence and determinants of glaucoma in citizens of qatar aged 40 years or older: a community-based survey. *Middle East Afr.J Ophthalmol* 2011;**18**:141-9.
98. Landers J, Henderson T, Craig J. The prevalence of glaucoma in indigenous Australians within Central Australia: the Central Australian Ocular Health Study. *Br.J Ophthalmol.* 2012;**96**:162-6.
99. Pakravan M, Yazdani S, Javadi MA, Amini H, Behroozi Z, Ziaei H et al. A population-based survey of the prevalence and types of glaucoma in central Iran: the Yazd eye study. *Ophthalmology* 2013;**120**:1977-84.
